# Supplementary material for: Association of maternal genetics with the gut microbiome and eucalypt diet selection in captive koalas
Source: PeerJ journal article supplement (doi:10.7717/peerj.17385), 2024-05-27
Supplement: FigS2.pdf [file FigS2.pdf]

### Unweighted UniFrac

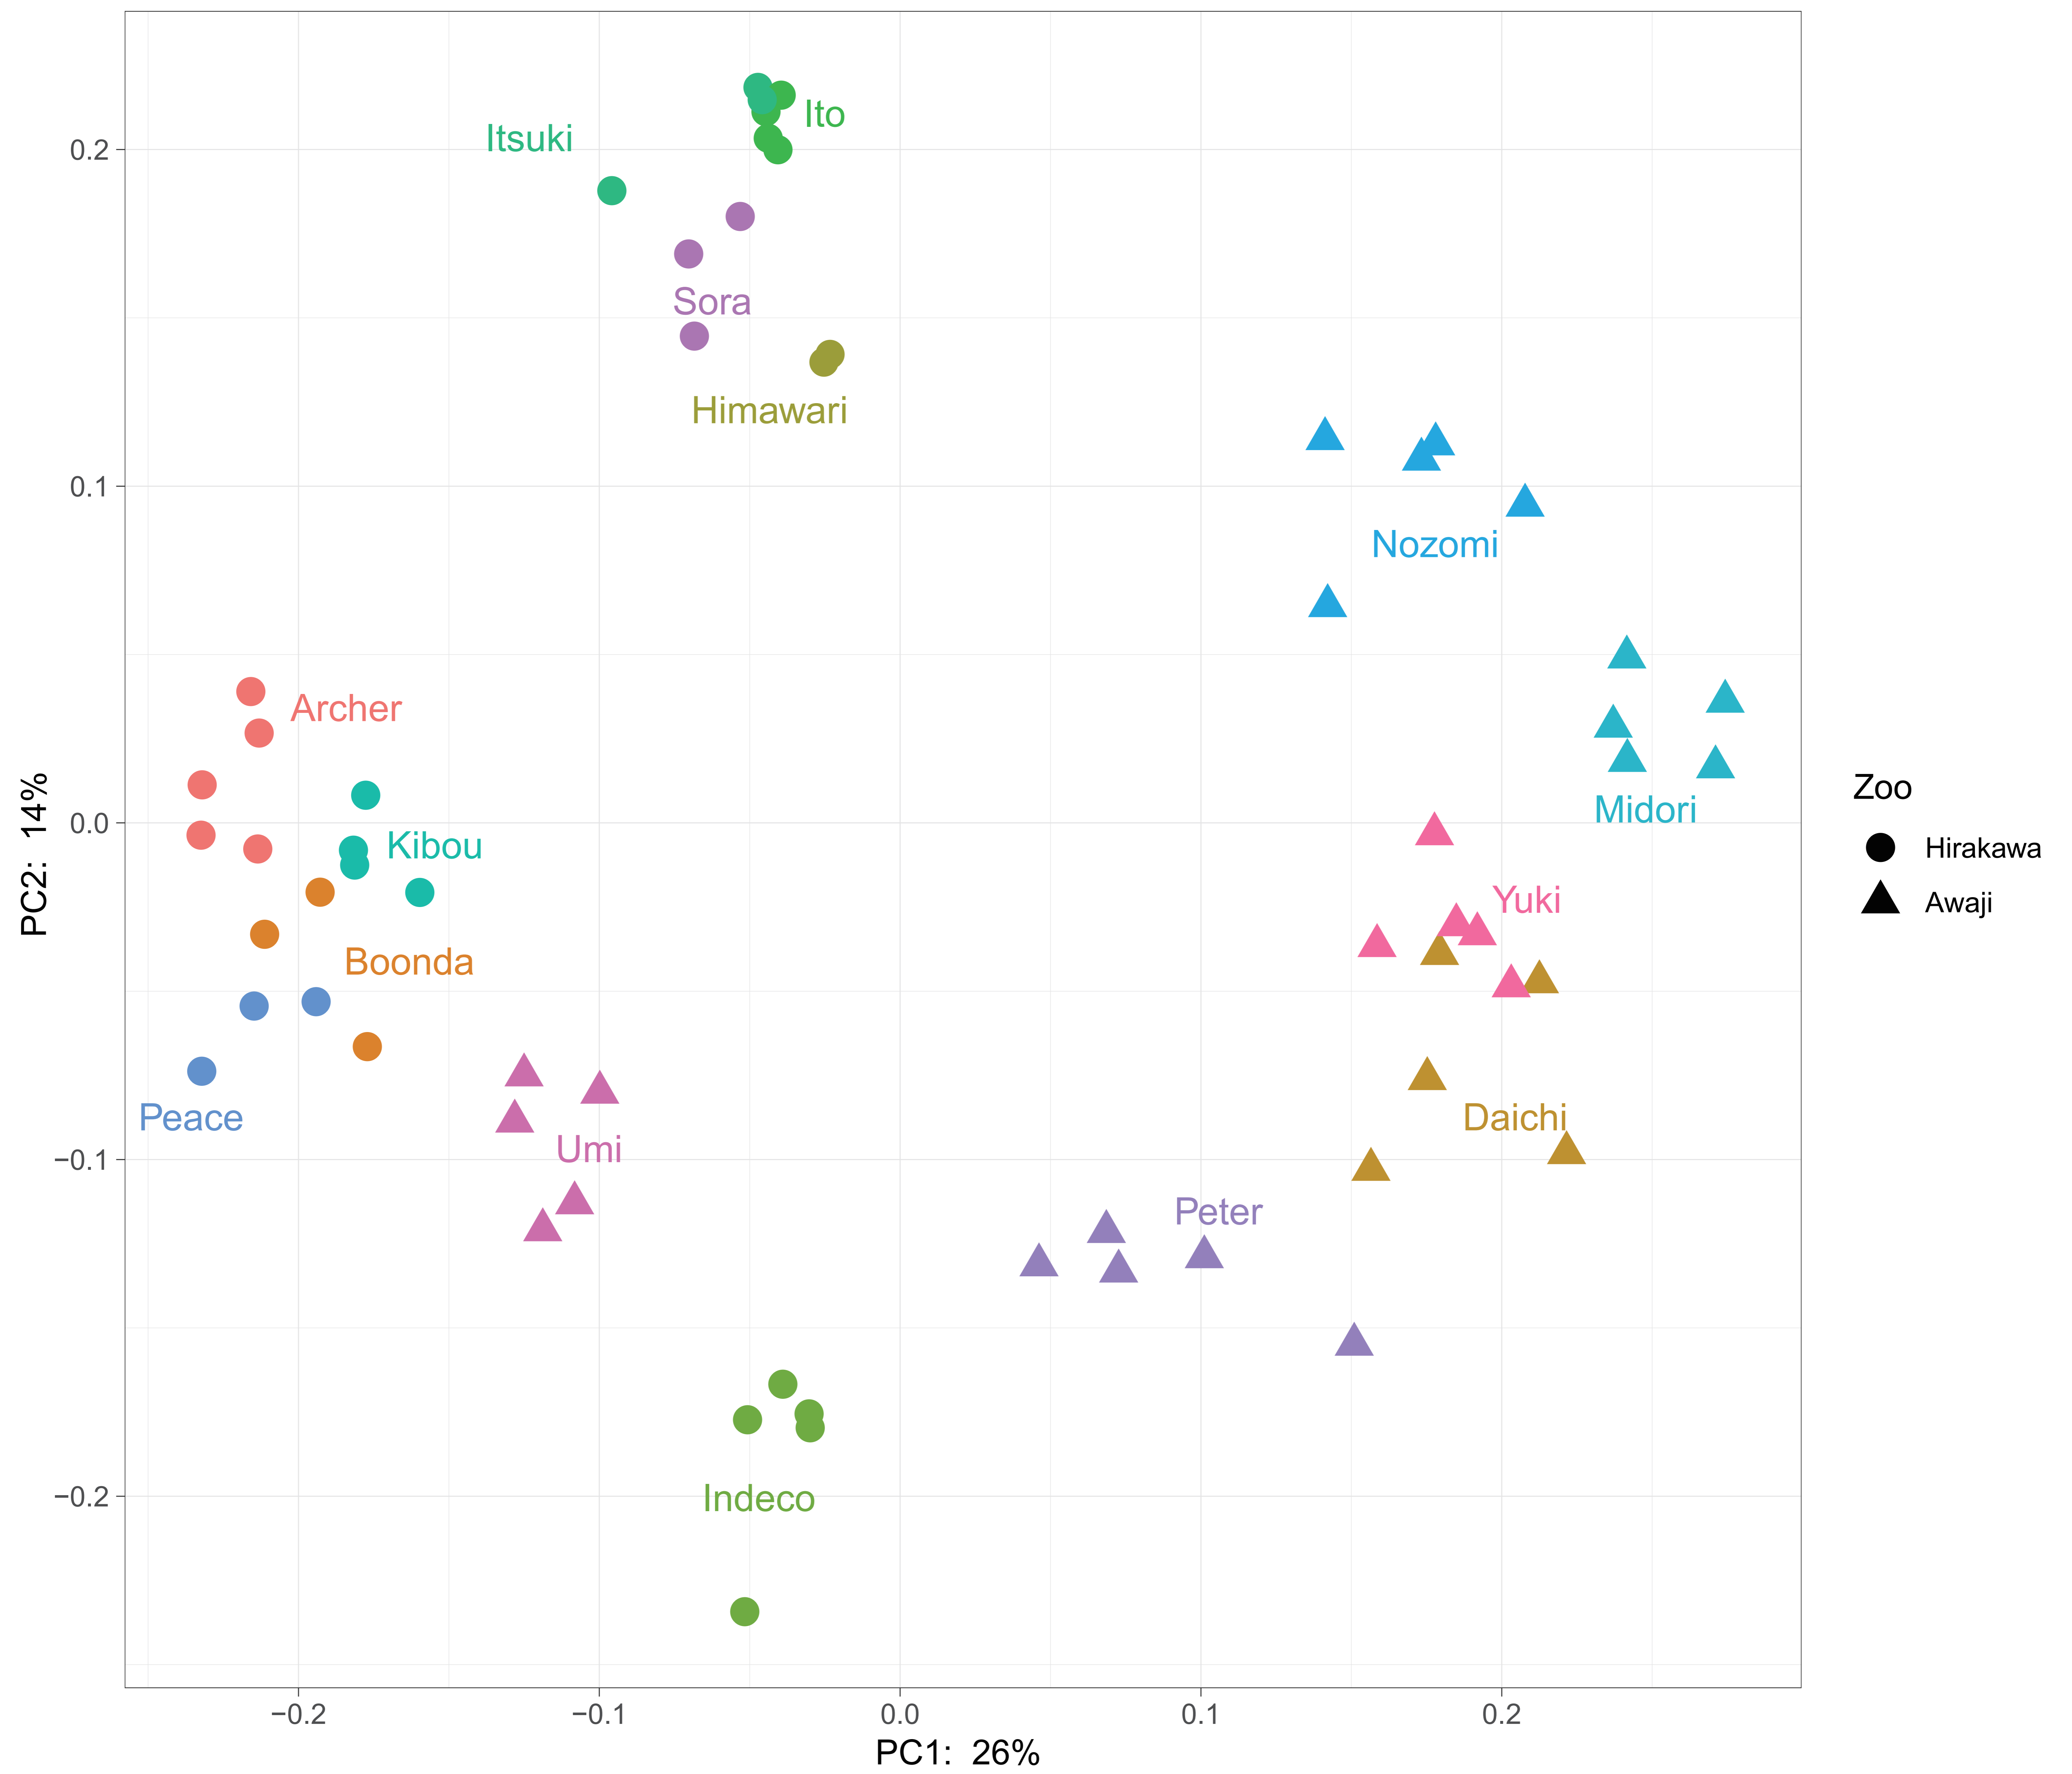

**Fig. S2** Principal components analysis of the unweighted UniFrac distances that include individual information (koala names and belonging zoos).
