# Supplementary material for: Association of maternal genetics with the gut microbiome and eucalypt diet selection in captive koalas
Source: PeerJ. 2024 May 27;12:e17385. doi: 10.7717/peerj.17385 (PMC11138522; doi:10.7717/peerj.17385)
Supplement: Supplemental Information 4 [file peerj-12-17385-s004.xlsx]

## Sheet: Tables S1
	Table S1 Additional information on koalas.
	Zoo	Name	DNA samples for phylogenetic analysis	Birthplace	Kinship
	Hirakawa	Boonda	blood	Sea Life Sydney Aquarium, Australia	Father of Ito and Peace
		Himawari	blood	Hirakawa, Japan	Sister of Sora, half-siblings of Itsuki and Kibou (with different mother)
		Itsuki	blood	Hirakawa, Japan	Grandson of Boonda, son of Ito, half-siblings of Kibou, Himawari and Sora (with different mother)
		Ito	blood	Hirakawa, Japan	Mother of Itsuki, daughter of Boonda, half-siblings of Peace (with different mother)
		Kibou	blood	Hirakawa, Japan	Half-siblings of Itsuki, Himawari, Sora (with different mother) and Peace (with different father).
		Sora	blood	Hirakawa, Japan	Brother of Himawari and Half-siblings of Itsuki and Kibou (with different mother).
		Indeco	feces	Higashiyama, Japan	Half-siblings of Peter (with different father)
		Archer	feces	Dream World, Australia	none
		Peace	feces	Hirakawa, Japan	Son of Boonda, Half-siblings of Ito (with different mother) and Kibou (with different father).
	Awaji	Yuki	feces	Yanchep National Park, Australia	none
		Daichi	feces	Awaji, Japan	none
		Nozomi	feces	Yanchep National Park, Australia	none
		Midori	feces	Yanchep National Park, Australia	none
		Umi	feces	Oji, Japan	none
		Peter	feces	Higashiyama, Japan	Half-siblings of Indeco (with different father)
