# Supplementary material for: Association of maternal genetics with the gut microbiome and eucalypt diet selection in captive koalas
Source: PeerJ. 2024 May 27;12:e17385. doi: 10.7717/peerj.17385 (PMC11138522; doi:10.7717/peerj.17385)
Supplement: Supplemental Information 5 [file peerj-12-17385-s005.xlsx]

## Sheet: Tables S2
	Table S2 Diet and microbiome diversity.
			Microbiome diversity
		Diet diversity	Shannon entropy	Pielou evenness	Simpson	Simpson e	Chao1	Faith pd	Observed features
	Itsuki	2.08394	3.72693	0.559792	0.786728	0.0513849	117.149	7.65179	101
	Boonda	1.99264	4.27623	0.623859	0.835631	0.0593747	129.109	8.10649	115.333
	Sora	1.95779	3.70804	0.569663	0.776914	0.0534101	103.147	7.01989	91
	Ito	1.68692	3.68118	0.553721	0.779987	0.0466571	113.16	7.14358	100.25
	Himawari	1.57284	2.94929	0.474105	0.640862	0.0375913	80.7083	6.43736	74.5
	Kibou	1.11757	3.40138	0.490278	0.673831	0.0285369	137.367	7.6201	122
