# Supplementary material for: Association of maternal genetics with the gut microbiome and eucalypt diet selection in captive koalas
Source: PeerJ. 2024 May 27;12:e17385. doi: 10.7717/peerj.17385 (PMC11138522; doi:10.7717/peerj.17385)
Supplement: Supplemental Information 6 [file peerj-12-17385-s006.xlsx]

## Sheet: Table S3
	Table S3 Microbiome alpha diversity.
	Sample ID	name	sex	lineage	origin	shannon_entropy	chao1	pielou_evenness	faith_pd	observed_features	simpson	simpson_e
	At23	Archer	Male	South	North	4.71975	187.158	0.649496	9.05732	154	0.907668	0.0703279
	At24	Archer	Male	South	North	4.53403	158.44	0.639725	8.80903	136	0.902879	0.0757089
	At25	Archer	Male	South	North	4.54368	157.167	0.64401	8.85939	133	0.905992	0.0799805
	At26	Archer	Male	South	North	4.37419	164.353	0.616254	9.00991	137	0.885795	0.0639136
	At27	Archer	Male	South	North	4.23493	144.895	0.607962	8.53438	125	0.879061	0.0661492
	Bu22	Boonda	Male	North2	North	4.31311	125.462	0.630065	7.98039	115	0.834746	0.0526198
	Bu29	Boonda	Male	North2	North	4.80944	138.867	0.693929	8.37255	122	0.90476	0.0860641
	Bu30	Boonda	Male	North2	North	3.70615	123	0.547584	7.96652	109	0.767386	0.0394401
	Da11.12	Daichi	Male	South	South	4.58396	90.1	0.723039	6.36451	81	0.925997	0.166828
	Da11.14	Daichi	Male	South	South	4.63281	82.5	0.737075	6.00738	78	0.928845	0.180178
	Da11.19	Daichi	Male	South	South	4.54988	84	0.72177	6.01493	79	0.92414	0.166863
	Da11.21	Daichi	Male	South	South	4.58779	70.75	0.748504	5.97157	70	0.928698	0.200355
	Da11.7	Daichi	Male	South	South	4.75058	105	0.735449	6.87014	88	0.934388	0.173194
	Hi24	Himawari	Female	South	North	3.11825	85.6667	0.497584	6.47608	77	0.672025	0.0395976
	Hi30	Himawari	Female	South	North	2.78033	75.75	0.450627	6.39863	72	0.609699	0.035585
	In.6.12	Indeco	Female	South	North	4.54228	113.583	0.671123	7.27332	109	0.895778	0.088027
	In.6.13	Indeco	Female	South	North	4.48871	128.4	0.653344	7.50994	117	0.898724	0.0843936
	In.6.14	Indeco	Female	South	North	4.09785	131.077	0.606649	7.27317	108	0.880323	0.0773687
	In.6.15	Indeco	Female	South	North	4.43275	138.714	0.642911	7.44249	119	0.90392	0.0874622
	In.6.16	Indeco	Female	South	North	4.23858	135.091	0.618051	7.52158	116	0.873246	0.0680114
	It21F	Itsuki	Male	Center	North	4.01368	135.091	0.591869	7.15206	110	0.840059	0.0568392
	It22	Itsuki	Male	Center	North	3.41665	98.8	0.525008	6.92896	91	0.728104	0.0404163
	It23a	Itsuki	Male	Center	North	3.71662	116.75	0.554684	7.28386	104	0.783939	0.0445032
	It23b	Ito	Female	Center	North	3.57777	102	0.543324	7.20945	96	0.767846	0.0448697
	Itk21	Ito	Female	Center	North	3.89943	117.5	0.575022	7.58795	110	0.803014	0.04615
	Itk24	Ito	Female	Center	North	3.20036	115.091	0.48601	7.21527	96	0.697247	0.0344064
	Itk26	Ito	Female	Center	North	4.08101	118.857	0.618343	8.15214	97	0.859925	0.0735983
	Kb21a	Kibou	Female	Center	North	3.12728	128.25	0.457681	7.57013	114	0.637244	0.0241813
	Kb21b2	Kibou	Female	Center	North	4.41457	152.056	0.621025	8.09693	138	0.839142	0.0450482
	kb26	Kibou	Female	Center	North	3.29013	121.929	0.48424	7.23022	111	0.667219	0.0270719
	Kb27	Kibou	Female	Center	North	2.77354	147.235	0.398166	7.58312	125	0.551721	0.017846
	Mi11.12	Midori	Female	South	South	4.12772	79.8	0.669007	5.70525	72	0.871967	0.108479
	Mi11.14	Midori	Female	South	South	4.27617	93.125	0.676402	5.51341	80	0.891085	0.114768
	Mi11.19	Midori	Female	South	South	4.16898	90.5	0.653953	5.92408	83	0.861453	0.0869613
	Mi11.21	Midori	Female	South	South	4.44586	92	0.690036	6.07778	87	0.909767	0.127384
	Mi11.7	Midori	Female	South	South	4.31991	76	0.700157	5.35095	72	0.912939	0.159531
	No11.12	Nozomi	Female	South	South	4.32158	61.2	0.728676	5.91754	61	0.911515	0.185267
	No11.14	Nozomi	Female	South	South	4.14398	91.4375	0.641539	7.12305	88	0.883959	0.0979281
	No11.19	Nozomi	Female	South	South	4.46879	107.125	0.691824	7.07821	88	0.914583	0.133038
	No11.21	Nozomi	Female	South	South	3.94696	91	0.617454	7.01934	84	0.871022	0.0923006
	No11.7	Nozomi	Female	South	South	4.32099	102.2	0.675966	6.81437	84	0.899043	0.117919
	Pc27	Peace	Female	Center	North	3.98931	155.476	0.559567	8.11278	140	0.762505	0.0300758
	Pc28	Peace	Female	Center	North	4.03222	154.5	0.563967	8.49907	142	0.771223	0.0307821
	Pc29	Peace	Female	Center	North	4.08165	154.222	0.569273	10.7195	144	0.782995	0.0320013
	Pt11.12	Peter	Male	South	North	4.05154	101.5	0.618123	6.97525	94	0.85178	0.0717736
	Pt11.14	Peter	Male	South	North	4.10787	82	0.653557	5.65785	78	0.862377	0.093157
	Pt11.19	Peter	Male	South	North	3.77847	72	0.625119	5.22936	66	0.82628	0.0872179
	Pt11.21	Peter	Male	South	North	4.0199	84.6154	0.630569	6.38354	83	0.85589	0.0836044
	Pt11.7	Peter	Male	South	North	3.88313	88.6	0.605849	5.98408	85	0.848431	0.0776196
	So22	Sora	Male	South	North	3.84563	114.111	0.588093	6.96781	93	0.796257	0.0527758
	So26	Sora	Male	South	North	4.03385	95.4	0.61985	7.16528	91	0.846082	0.0713952
	So27	Sora	Male	South	North	3.24464	99.9286	0.501046	6.92656	89	0.688403	0.0360593
	Um11.12	Umi	Female	North2	North	4.46928	127.462	0.650516	7.60494	117	0.875888	0.068865
	Um11.14	Umi	Female	North2	North	4.0493	107.235	0.604334	6.96962	104	0.814808	0.0519211
	Um11.19	Umi	Female	North2	North	3.82486	119.688	0.565124	6.7998	109	0.813502	0.0491925
	Um11.21	Umi	Female	North2	North	4.10799	124.769	0.602329	6.91297	113	0.849783	0.0589117
	Um11.7	Umi	Female	North2	North	4.29221	136	0.624743	7.38888	117	0.85461	0.0587866
	Yu11.12	Yuki	Male	South	South	4.26595	100.909	0.662113	6.6366	87	0.914113	0.133829
	Yu11.14	Yuki	Male	South	South	4.05512	105.667	0.636093	6.37835	83	0.894545	0.11425
	Yu11.19	Yuki	Male	South	South	4.20302	93	0.668695	6.40235	78	0.904759	0.134611
	Yu11.21	Yuki	Male	South	South	4.21647	83.8	0.674859	6.42546	76	0.899774	0.131282
	Yu11.7	Yuki	Male	South	South	4.03114	83.5	0.643255	6.07528	77	0.896697	0.125718
