# Supplementary material for: Association of maternal genetics with the gut microbiome and eucalypt diet selection in captive koalas
Source: PeerJ. 2024 May 27;12:e17385. doi: 10.7717/peerj.17385 (PMC11138522; doi:10.7717/peerj.17385)
Supplement: Supplemental Information 7 [file peerj-12-17385-s007.xlsx]

## Sheet: Table S4
	Table S4 Significant taxa from the ANCOM results (management groups).
			Southern						Northern
	Taxon	W	0	0.25	0.5	0.75	1		0	0.25	0.5	0.75	1
	d__Bacteria;p__Firmicutes;c__Clostridia;o__Oscillospirales;f__[Eubacterium]_coprostanoligenes_group;g__[Eubacterium]_coprostanoligenes_group	119	1	1	1	1	1		2	13.25	29	52.5	275
	d__Bacteria;p__Bacteroidota;c__Bacteroidia;o__Bacteroidales;f__Prevotellaceae;g__Paraprevotella	118	52	59.25	75.5	117	178		1	1	1	1	1
	d__Bacteria;p__Bacteroidota;c__Bacteroidia;o__Bacteroidales;f__Tannerellaceae;__	114	73	98	184.5	292.75	463		1	1	3	14.75	262
	d__Bacteria;p__Bacteroidota;c__Bacteroidia;o__Bacteroidales;f__Tannerellaceae;g__Parabacteroides	112	342	552.75	740.5	1056.5	1149		8	30.25	51.5	92.25	2480
	d__Bacteria;p__Firmicutes;c__Clostridia;o__Lachnospirales;f__Lachnospiraceae;g__Tyzzerella	111	11	49.5	103	148.75	464		1	1	4	33	204
	d__Bacteria;p__Synergistota;c__Synergistia;o__Synergistales;f__Synergistaceae;__	111	1	19	51	92.75	140		1	1	2	4	10
	d__Bacteria;p__Firmicutes;c__Clostridia;o__Oscillospirales;f__Oscillospiraceae;g__uncultured	108	6	9	24	49.25	104		1	1	1	4.75	42
	d__Bacteria;p__Verrucomicrobiota;c__Verrucomicrobiae;o__Verrucomicrobiales;f__Akkermansiaceae;g__Akkermansia	107	66	166	272	335.75	708		1	32.5	47.5	88	155
	d__Bacteria;p__Firmicutes;c__Clostridia;o__Lachnospirales;f__Lachnospiraceae;g__Roseburia	106	1	1	1	1	1		1	1	16.5	50	217
	d__Bacteria;p__Firmicutes;c__Clostridia;o__Lachnospirales;f__Lachnospiraceae;__	104	1	7.75	13.5	58	550		40	121.5	192	301.75	591
	d__Bacteria;p__Actinobacteriota;c__Coriobacteriia;o__Coriobacteriales;__;__	101	1	1	1	1	1		1	3	6	9.75	29
	d__Bacteria;p__Proteobacteria;c__Gammaproteobacteria;o__Enterobacterales;__;__	99	1	1	2	42.75	336		1	1	1	1	3
