# Supplementary material for: Association of maternal genetics with the gut microbiome and eucalypt diet selection in captive koalas
Source: PeerJ. 2024 May 27;12:e17385. doi: 10.7717/peerj.17385 (PMC11138522; doi:10.7717/peerj.17385)
Supplement: Supplemental Information 8 [file peerj-12-17385-s008.xlsx]

## Sheet: Table S5
	Table S5 Significant taxa from the ANCOM results (mitochondrial lineages).
			Southern						Central						Northern 2
	Taxon	W	0	0.25	0.5	0.75	1		0	0.25	0.5	0.75	1		0	0.25	0.5	0.75	1
	d__Bacteria;p__Bacteroidota;c__Bacteroidia;o__Bacteroidales;f__Tannerellaceae;__	119	1	19.5	98	206	463		1	1	2	5.5	12		1	1	1	1	1
	d__Bacteria;p__Bacteroidota;c__Bacteroidia;o__Bacteroidales;f__Rikenellaceae;g__Rikenellaceae	111	1	1	1	1	12		1	1	1	1	1		6	13.75	20.5	24.25	31
