# Supplementary material for: Association of maternal genetics with the gut microbiome and eucalypt diet selection in captive koalas
Source: PeerJ. 2024 May 27;12:e17385. doi: 10.7717/peerj.17385 (PMC11138522; doi:10.7717/peerj.17385)
Supplement: Supplemental Information 9 [file peerj-12-17385-s009.xlsx]

## Sheet: Tables S6
	Table S6 Spearman’s rank correlation of microbiome diversity with diet diversity.
	Index	ρ	P
	Shannon entropy	0.885714	0.009*
	Pielou evenness	0.77	0.036*
	Simpson	0.83	0.021*
	Simpson e	0.83	0.021*
	Chao1	0.03	0.479
	Faith pd	0.54	0.133
	Observed features	0.03	0.479
	*P < 0.05.
