# Supplementary material for: Association of maternal genetics with the gut microbiome and eucalypt diet selection in captive koalas
Source: PeerJ. 2024 May 27;12:e17385. doi: 10.7717/peerj.17385 (PMC11138522; doi:10.7717/peerj.17385)
Supplement: Supplemental Information 10 [file peerj-12-17385-s010.xlsx]

## Sheet: Table S7
	Table S7 Correlations between the gut microbiome and eucalypt diet.
		q						ρ
	Taxonomy	T	M	CR	R	P		T	M	CR	R	P
	d__Bacteria.p__Cyanobacteria.c__Vampirivibrionia.o__Gastranaerophilales.f__Gastranaerophilales.g__Gastranaerophilales	0.328723	0.787172	0.871743	0.622787	0.468478		-0.485714	0.142857	-0.0857143	0.257143	-0.371429
	d__Bacteria.p__Bacteroidota.c__Bacteroidia.o__Bacteroidales.f__Rikenellaceae.g__Alistipes	0.787172	0.787172	0.00480466	0.328723	0.328723		-0.142857	-0.142857	-0.942857	0.485714	0.485714
	d__Bacteria.p__Firmicutes.c__Clostridia.o__Lachnospirales.f__Lachnospiraceae.g__Shuttleworthia	0.957155	0.871743	0.328723	0.704	0.468478		-0.0285714	0.0857143	-0.485714	-0.2	0.371429
	d__Bacteria.p__Proteobacteria.c__Gammaproteobacteria.o__Pasteurellales.f__Pasteurellaceae.g__Lonepinella	0.396501	0.787172	0.468478	0.396501	0.871743		0.428571	0.142857	0.371429	-0.428571	0.0857143
	d__Bacteria.p__Verrucomicrobiota.c__Lentisphaeria.o__Victivallales.f__Victivallaceae.g__Victivallaceae	0.267778	0.557699	0.748868	0.798399	0.748868		-0.540899	-0.304256	0.169031	0.135225	-0.169031
	d__Bacteria.p__Firmicutes.c__Clostridia.o__Oscillospirales.f__Oscillospiraceae.__	0.468478	0.871743	0.265703	0.622787	0.544093		-0.371429	0.0857143	0.542857	-0.257143	-0.314286
	d__Bacteria.p__Firmicutes.c__Clostridia.o__Oscillospirales.f__Ruminococcaceae.g__Ruminococcus	0.704	0.265703	0.871743	0.787172	0.328723		-0.2	0.542857	0.0857143	-0.142857	-0.485714
	d__Bacteria.p__Bacteroidota.c__Bacteroidia.o__Bacteroidales.f__Bacteroidaceae.g__Bacteroides	0.787172	0.871743	0.871743	0.704	0.468478		-0.142857	-0.0857143	-0.0857143	-0.2	-0.371429
	d__Bacteria.p__Firmicutes.c__Clostridia.o__Oscillospirales.f__Ruminococcaceae.g__Incertae_Sedis	0.704	0.396501	0.544093	0.156175	0.265703		0.2	0.428571	0.314286	-0.657143	-0.542857
	d__Bacteria.p__Firmicutes.c__Clostridia.o__Lachnospirales.f__Lachnospiraceae.g__Roseburia	0.537901	0.658374	0.826848	0.741734	0.354164		-0.318874	0.231908	0.115954	-0.173931	-0.463817
	d__Bacteria.p__Firmicutes.c__Clostridia.o__Lachnospirales.f__Lachnospiraceae.g__Blautia	0.826848	0.826848	0.124789	0.424663	0.537901		0.115954	-0.115954	-0.695725	-0.40584	0.318874
	d__Bacteria.p__Firmicutes.c__Clostridia.o__Lachnospirales.f__Lachnospiraceae.__	0.871743	0.468478	0.544093	0.208	0.622787		-0.0857143	0.371429	-0.314286	0.6	0.257143
	d__Bacteria.p__Firmicutes.c__Clostridia.o__Oscillospirales.f__Oscillospiraceae.g__NK4A214_group	0.787172	0.265703	0.208	0.396501	0.544093		0.142857	0.542857	-0.6	0.428571	-0.314286
	d__Bacteria.p__Bacteroidota.c__Bacteroidia.o__Bacteroidales.f__Dysgonomonadaceae.g__uncultured	0.804726	0.441113	0.804726	0.158302	0.804726		0.130931	0.392792	-0.130931	0.654654	-0.130931
	d__Bacteria.p__Firmicutes.c__Bacilli.o__Erysipelotrichales.f__Erysipelatoclostridiaceae.__	0.704	0.208	0.468478	0.208	0.328723		-0.2	0.6	0.371429	0.6	-0.485714
	d__Bacteria.p__Bacteroidota.c__Bacteroidia.o__Bacteroidales.f__Tannerellaceae.__	0.438739	0.600355	0.5177	0.686031	0.5177		0.394665	-0.27323	0.333947	-0.212512	0.333947
	d__Bacteria.p__Firmicutes.c__Negativicutes.o__Acidaminococcales.f__Acidaminococcaceae.g__Phascolarctobacterium	0.622787	0.328723	0.704	0.110787	0.871743		-0.257143	0.485714	-0.2	0.714286	0.0857143
	d__Bacteria.p__Bacteroidota.c__Bacteroidia.o__Bacteroidales.f__Tannerellaceae.g__Parabacteroides	0.468478	0.871743	0.265703	0.208	0.957155		-0.371429	-0.0857143	-0.542857	0.6	0.0285714
	d__Bacteria.p__Proteobacteria.c__Gammaproteobacteria.o__Enterobacterales.__.__	0.804726	0.804726	0.158302	0.804726	0.158302		-0.130931	0.130931	0.654654	-0.130931	-0.654654
	d__Bacteria.p__Actinobacteriota.c__Coriobacteriia.o__Coriobacteriales.f__Eggerthellaceae.g__Eggerthella	0.441113	0.804726	0.441113	0.804726	0.441113		-0.392792	-0.130931	0.392792	0.130931	0.392792
	d__Bacteria.p__Firmicutes.c__Clostridia.o__Lachnospirales.f__Lachnospiraceae.g__Hungatella	0.954476	0.5177	0.0801412	0.438739	0.774058		0.0303588	-0.333947	0.758971	-0.394665	0.151794
	d__Bacteria.p__Firmicutes.c__Negativicutes.o__Acidaminococcales.f__Acidaminococcaceae.__	0.396501	0.468478	0.208	0.468478	0.622787		0.428571	-0.371429	-0.6	-0.371429	0.257143
	d__Bacteria.p__Firmicutes.c__Clostridia.o__Peptococcales.f__Peptococcaceae.__	0.158302	0.158302	0.158302	0.441113	0.158302		-0.654654	-0.654654	-0.654654	0.392792	0.654654
	d__Bacteria.p__Actinobacteriota.c__Coriobacteriia.o__Coriobacteriales.f__Eggerthellaceae.g__Gordonibacter	0.94931	0.383221	0.557699	0.304559	0.267778		0.0338062	0.43948	0.304256	0.507093	-0.540899
	d__Bacteria.p__Firmicutes.c__Clostridia.o__Oscillospirales.f__.Eubacterium._coprostanoligenes_group.g__.Eubacterium._coprostanoligenes_group	0.622787	0.468478	0.265703	0.787172	0.622787		-0.257143	0.371429	-0.542857	0.142857	-0.257143
	d__Bacteria.p__Firmicutes.c__Clostridia.o__Oscillospirales.f__Oscillospiraceae.g__Colidextribacter	0.622787	0.396501	0.957155	0.871743	0.208		-0.257143	0.428571	-0.0285714	0.0857143	-0.6
	d__Bacteria.p__Bacteroidota.c__Bacteroidia.o__Bacteroidales.f__Rikenellaceae.g__Rikenellaceae	0.804726	0.804726	0.158302	0.804726	0.158302		-0.130931	0.130931	0.654654	-0.130931	-0.654654
	d__Bacteria.p__Bacteroidota.c__Bacteroidia.o__Bacteroidales.f__Marinifilaceae.g__Butyricimonas	0.441113	0.158302	0.441113	0.441113	0.441113		0.392792	0.654654	-0.392792	-0.392792	-0.392792
	d__Bacteria.p__Fusobacteriota.c__Fusobacteriia.o__Fusobacteriales.f__Fusobacteriaceae.g__Fusobacterium	0.957155	0.957155	0.396501	0.396501	0.787172		0.0285714	-0.0285714	0.428571	0.428571	0.142857
	d__Bacteria.p__Firmicutes.c__Clostridia.__.__.__	0.94931	0.383221	0.557699	0.304559	0.267778		0.0338062	0.43948	0.304256	0.507093	-0.540899
	d__Bacteria.p__Actinobacteriota.c__Coriobacteriia.o__Coriobacteriales.__.__	0.622787	0.787172	0.704	0.622787	0.871743		-0.257143	0.142857	-0.2	-0.257143	0.0857143
	d__Bacteria.p__Bacteroidota.c__Bacteroidia.o__Bacteroidales.f__Muribaculaceae.g__Muribaculaceae	0.328723	0.622787	0.328723	0.957155	0.468478		0.485714	-0.257143	-0.485714	-0.0285714	0.371429
	d__Bacteria.p__Desulfobacterota.c__Desulfovibrionia.o__Desulfovibrionales.f__Desulfovibrionaceae.g__Bilophila	0.396501	0	0.871743	0.957155	0.0723965		-0.428571	-1	-0.0857143	0.0285714	0.771429
	d__Bacteria.p__Bacteroidota.c__Bacteroidia.o__Bacteroidales.f__Rikenellaceae.__	0.328723	0.787172	0.871743	0.622787	0.468478		0.485714	-0.142857	0.0857143	-0.257143	0.371429
	d__Bacteria.p__Firmicutes.c__Clostridia.o__Christensenellales.f__Christensenellaceae.g__Catabacter	0.441113	0.804726	0.441113	0.804726	0.441113		-0.392792	-0.130931	0.392792	0.130931	0.392792
	d__Bacteria.p__Proteobacteria.c__Gammaproteobacteria.o__Burkholderiales.f__Sutterellaceae.g__Parasutterella	0.396501	0.704	0.328723	0.871743	0.871743		-0.428571	0.2	-0.485714	0.0857143	0.0857143
	d__Bacteria.p__Firmicutes.c__Clostridia.o__Oscillospirales.f__Ruminococcaceae.__	0.787172	0.396501	0.156175	0.544093	0.328723		0.142857	0.428571	0.657143	0.314286	-0.485714
	d__Bacteria.p__Firmicutes.c__Clostridia.o__Lachnospirales.f__Lachnospiraceae.g__Lachnoclostridium	0.622787	0.871743	0.787172	0.871743	0.396501		0.257143	-0.0857143	0.142857	-0.0857143	0.428571
	d__Bacteria.p__Bacteroidota.c__Bacteroidia.o__Bacteroidales.f__Rikenellaceae.g__Rikenella	0.804726	0.441113	0.804726	0.158302	0.804726		0.130931	0.392792	-0.130931	0.654654	-0.130931
	d__Bacteria.p__Firmicutes.c__Clostridia.o__Oscillospirales.f__Oscillospiraceae.g__UCG.005	0.956529	0.658374	0.227784	0.354164	0.784108		-0.0289886	0.231908	0.579771	0.463817	-0.144943
	d__Bacteria.p__Desulfobacterota.c__Desulfovibrionia.o__Desulfovibrionales.f__Desulfovibrionaceae.__	0.438739	0.863763	0.230732	0.954476	0.954476		-0.394665	-0.0910765	-0.576818	0.0303588	0.0303588
	Unassigned.__.__.__.__.__	0.804726	0.441113	0.804726	0.158302	0.804726		0.130931	0.392792	-0.130931	0.654654	-0.130931
	d__Bacteria.p__Bacteroidota.c__Bacteroidia.o__Bacteroidales.f__Marinifilaceae.g__Odoribacter	0.699798	0.577352	0.173071	0.124789	0.913132		-0.20292	0.289886	-0.637748	0.695725	-0.0579771
	d__Bacteria.p__Planctomycetota.c__vadinHA49.o__vadinHA49.f__vadinHA49.g__vadinHA49	0.957155	0.468478	0.0723965	0.787172	0.704		0.0285714	0.371429	-0.771429	0.142857	-0.2
	d__Bacteria.p__Desulfobacterota.c__Desulfovibrionia.o__Desulfovibrionales.f__Desulfovibrionaceae.g__Mailhella	0.804726	0.804726	0.158302	0.804726	0.158302		-0.130931	0.130931	0.654654	-0.130931	-0.654654
	d__Bacteria.p__Firmicutes.c__Clostridia.o__Oscillospirales.f__Ruminococcaceae.g__Candidatus_Soleaferrea	0.622787	0.622787	0.328723	0.622787	0.871743		-0.257143	-0.257143	-0.485714	-0.257143	0.0857143
	d__Bacteria.p__Synergistota.c__Synergistia.o__Synergistales.f__Synergistaceae.g__Cloacibacillus	0.396501	0.957155	0.957155	0.787172	0.622787		-0.428571	-0.0285714	-0.0285714	-0.142857	0.257143
	d__Bacteria.p__Proteobacteria.c__Alphaproteobacteria.__.__.__	0.499253	0.499253	1	0.173071	0.388865		0.347863	-0.347863	0	-0.637748	0.434828
	d__Bacteria.p__Firmicutes.c__Bacilli.o__Lactobacillales.f__Streptococcaceae.g__Streptococcus	0.441113	0.804726	0.441113	0.804726	0.441113		-0.392792	-0.130931	0.392792	0.130931	0.392792
	d__Bacteria.p__Desulfobacterota.c__Desulfovibrionia.o__Desulfovibrionales.__.__	0.871743	0.265703	0.328723	0.328723	0.871743		-0.0857143	-0.542857	0.485714	-0.485714	-0.0857143
	d__Bacteria.p__Synergistota.c__Synergistia.o__Synergistales.f__Synergistaceae.g__Synergistes	0.804726	0.804726	0.158302	0.804726	0.158302		-0.130931	0.130931	0.654654	-0.130931	-0.654654
	d__Bacteria.p__Bacteroidota.c__Bacteroidia.o__Bacteroidales.f__Prevotellaceae.g__Prevotella	0.512225	0.383221	0.46791	0.304559	0.46791		0.338062	-0.43948	0.371868	-0.507093	0.371868
	d__Bacteria.p__Firmicutes.c__Clostridia.o__Peptostreptococcales.Tissierellales.f__Anaerovoracaceae.g__Anaerovorax	0.804726	0.804726	0.158302	0.804726	0.158302		-0.130931	0.130931	0.654654	-0.130931	-0.654654
	d__Bacteria.p__Desulfobacterota.c__Desulfovibrionia.o__Desulfovibrionales.f__Desulfovibrionaceae.g__uncultured	0.208	0.704	0.328723	0.871743	0.871743		-0.6	-0.2	0.485714	-0.0857143	-0.0857143
	d__Bacteria.p__Firmicutes.c__Clostridia.o__Christensenellales.f__Christensenellaceae.g__Christensenellaceae_R.7_group	0.871743	0.156175	0.265703	0.468478	0.208		-0.0857143	-0.657143	-0.542857	-0.371429	0.6
	d__Bacteria.p__Desulfobacterota.c__Desulfovibrionia.o__Desulfovibrionales.f__Desulfovibrionaceae.g__Desulfovibrio	0.468478	0.156175	0.396501	0.208	0.110787		-0.371429	-0.657143	-0.428571	0.6	0.714286
	d__Bacteria.p__Bacteroidota.c__Bacteroidia.o__Bacteroidales.f__Dysgonomonadaceae.g__Dysgonomonas	0.787172	0.396501	0.156175	0.544093	0.328723		-0.142857	-0.428571	-0.657143	-0.314286	0.485714
	d__Bacteria.p__Proteobacteria.c__Gammaproteobacteria.o__Burkholderiales.__.__	0.622787	0.871743	0.787172	0.871743	0.396501		0.257143	-0.0857143	0.142857	-0.0857143	0.428571
	d__Bacteria.p__Actinobacteriota.c__Coriobacteriia.o__Coriobacteriales.f__Eggerthellaceae.g__Enterorhabdus	0.804726	0.804726	0.158302	0.804726	0.158302		-0.130931	0.130931	0.654654	-0.130931	-0.654654
	d__Bacteria.p__Actinobacteriota.c__Coriobacteriia.o__Coriobacteriales.f__Eggerthellaceae.__	0.898736	0.46791	0.383221	0.557699	0.383221		0.0676123	-0.371868	0.43948	-0.304256	0.43948
	d__Bacteria.p__Firmicutes.c__Negativicutes.o__Acidaminococcales.f__Acidaminococcaceae.g__uncultured	0.537901	0.577352	0.0835233	0.424663	0.956529		0.318874	-0.289886	0.753702	-0.40584	0.0289886
	d__Bacteria.p__Proteobacteria.c__Gammaproteobacteria.o__Enterobacterales.f__Pectobacteriaceae.g__Dickeya	0.898736	0.46791	0.383221	0.557699	0.383221		0.0676123	-0.371868	0.43948	-0.304256	0.43948
	d__Bacteria.p__Firmicutes.c__Clostridia.o__Lachnospirales.f__Lachnospiraceae.g__Tyzzerella	0.544093	0.468478	0.396501	0.704	0.787172		-0.314286	0.371429	-0.428571	0.2	0.142857
	d__Bacteria.p__Firmicutes.c__Clostridia.o__Lachnospirales.f__Lachnospiraceae.g__Sellimonas	0.294584	0.774058	0.686031	0.122839	0.686031		0.5161	-0.151794	0.212512	-0.698253	0.212512
	d__Bacteria.p__Rs.K70_termite_group.c__Rs.K70_termite_group.o__Rs.K70_termite_group.f__Rs.K70_termite_group.g__Rs.K70_termite_group	0.328723	0.704	0.871743	0.0415627	0.704		0.485714	-0.2	-0.0857143	-0.828571	0.2
	d__Bacteria.p__Firmicutes.c__Clostridia.o__Oscillospirales.f__Oscillospiraceae.g__Intestinimonas	0.774058	0.600355	0.954476	0.686031	0.230732		-0.151794	0.27323	0.0303588	-0.212512	-0.576818
	d__Bacteria.__.__.__.__.__	0.328723	0.328723	0.208	0.787172	0.0415627		-0.485714	-0.485714	-0.6	0.142857	0.828571
	d__Bacteria.p__Firmicutes.c__Bacilli.o__Erysipelotrichales.f__Erysipelotrichaceae.g__Breznakia	0.898736	0.748868	0.0687269	0.848394	0.898736		-0.0676123	0.169031	-0.777542	-0.101419	0.0676123
	d__Bacteria.p__Synergistota.c__Synergistia.o__Synergistales.f__Synergistaceae.__	0.787172	0.704	0.00480466	0.871743	0.704		0.142857	0.2	-0.942857	0.0857143	0.2
	d__Bacteria.p__Proteobacteria.c__Gammaproteobacteria.o__Burkholderiales.f__Neisseriaceae.__	0.774058	0.600355	0.954476	0.686031	0.230732		-0.151794	0.27323	0.0303588	-0.212512	-0.576818
	d__Bacteria.p__Proteobacteria.c__Gammaproteobacteria.o__Burkholderiales.f__Oxalobacteraceae.__	0.328723	0.396501	0.704	0.871743	0.156175		0.485714	0.428571	0.2	0.0857143	-0.657143
	d__Bacteria.p__Firmicutes.c__Negativicutes.o__Veillonellales.Selenomonadales.f__Selenomonadaceae.g__Megamonas	0.804726	0.441113	0.804726	0.158302	0.804726		0.130931	0.392792	-0.130931	0.654654	-0.130931
	d__Bacteria.p__Verrucomicrobiota.c__Lentisphaeria.o__Victivallales.f__vadinBE97.g__vadinBE97	0.804726	0.804726	0.158302	0.804726	0.158302		-0.130931	0.130931	0.654654	-0.130931	-0.654654
	d__Bacteria.p__Firmicutes.c__Clostridia.o__Oscillospirales.f__UCG.010.g__UCG.010	0.774058	0.600355	0.954476	0.686031	0.230732		-0.151794	0.27323	0.0303588	-0.212512	-0.576818
	d__Bacteria.p__Actinobacteriota.c__Coriobacteriia.o__Coriobacteriales.f__Coriobacteriales_Incertae_Sedis.g__uncultured	0.804726	0.804726	0.158302	0.804726	0.158302		-0.130931	0.130931	0.654654	-0.130931	-0.654654
	d__Bacteria.p__Firmicutes.c__Clostridia.o__Eubacteriales.f__Anaerofustaceae.g__Anaerofustis	0.898736	0.46791	0.383221	0.557699	0.383221		0.0676123	-0.371868	0.43948	-0.304256	0.43948
	d__Bacteria.p__Bacteroidota.c__Bacteroidia.o__Bacteroidales.__.__	0.774058	0.686031	0.0801412	0.122839	0.774058		-0.151794	0.212512	-0.758971	0.698253	0.151794
	d__Bacteria.p__Actinobacteriota.c__Coriobacteriia.o__Coriobacteriales.f__Coriobacteriales_Incertae_Sedis.g__Raoultibacter	0.94931	0.383221	0.557699	0.304559	0.267778		0.0338062	0.43948	0.304256	0.507093	-0.540899
	d__Bacteria.p__Firmicutes.c__Clostridia.o__Peptococcales.f__Peptococcaceae.g__uncultured	0.804726	0.441113	0.804726	0.158302	0.804726		0.130931	0.392792	-0.130931	0.654654	-0.130931
	d__Bacteria.p__Firmicutes.c__Clostridia.o__Oscillospirales.f__Butyricicoccaceae.g__Butyricicoccus	0.804726	0.804726	0.158302	0.804726	0.158302		-0.130931	0.130931	0.654654	-0.130931	-0.654654
	d__Bacteria.p__Deferribacterota.c__Deferribacteres.o__Deferribacterales.f__Deferribacteraceae.g__Mucispirillum	0.156175	0.00480466	0.957155	0.704	0.0415627		-0.657143	-0.942857	-0.0285714	0.2	0.828571
	d__Bacteria.p__Firmicutes.c__Clostridia.o__Christensenellales.f__Christensenellaceae.g__Christensenella	0.158302	0.158302	0.158302	0.441113	0.158302		-0.654654	-0.654654	-0.654654	0.392792	0.654654
	d__Bacteria.p__Firmicutes.c__Clostridia.o__Oscillospirales.__.__	0.438739	0.00509754	0.774058	0.954476	0.0801412		0.394665	0.941124	-0.151794	0.0303588	-0.758971
	d__Bacteria.p__Bacteroidota.c__Bacteroidia.o__Bacteroidales.f__Muribaculaceae.__	0.956529	1	0.227784	0.658374	0.784108		0.0289886	0	0.579771	0.231908	0.144943
	d__Bacteria.p__Firmicutes.c__Negativicutes.o__Veillonellales.Selenomonadales.f__Selenomonadaceae.__	0.512225	0.748868	0.0341094	0.848394	0.512225		-0.338062	-0.169031	-0.845154	0.101419	0.338062
	d__Archaea.p__Euryarchaeota.c__Methanobacteria.o__Methanobacteriales.f__Methanobacteriaceae.g__Methanosphaera	0.441113	0.158302	0.441113	0.441113	0.441113		0.392792	0.654654	-0.392792	-0.392792	-0.392792
	d__Bacteria.p__Firmicutes.c__Negativicutes.o__Veillonellales.Selenomonadales.f__Selenomonadaceae.g__uncultured	0.512225	0.748868	0.0341094	0.848394	0.512225		-0.338062	-0.169031	-0.845154	0.101419	0.338062
	d__Bacteria.p__Firmicutes.c__Clostridia.o__Oscillospirales.f__Oscillospiraceae.g__uncultured	0.784108	0.499253	0.227784	0.913132	0.577352		-0.144943	0.347863	-0.579771	0.0579771	-0.289886
	d__Bacteria.p__Firmicutes.c__Clostridia.o__Monoglobales.f__Monoglobaceae.g__Monoglobus	0.804726	0.804726	0.158302	0.804726	0.158302		-0.130931	0.130931	0.654654	-0.130931	-0.654654
	d__Bacteria.p__Desulfobacterota.c__Desulfobacteria.o__Desulfobacterales.f__uncultured.g__uncultured	0.787172	0.208	0.787172	0.468478	0.110787		0.142857	-0.6	-0.142857	-0.371429	0.714286
	d__Bacteria.p__Firmicutes.c__Clostridia.o__Lachnospirales.f__Lachnospiraceae.g__.Eubacterium._hallii_group	0.94931	0.46791	0.304559	0.557699	0.140357		-0.0338062	0.371868	0.507093	0.304256	-0.676123
	d__Bacteria.p__Verrucomicrobiota.c__Verrucomicrobiae.o__Verrucomicrobiales.f__Akkermansiaceae.g__Akkermansia	0.622787	0.704	0.957155	0.622787	0.622787		0.257143	0.2	-0.0285714	-0.257143	0.257143
	d__Bacteria.p__Firmicutes.c__Clostridia.o__Oscillospirales.f__Oscillospiraceae.g__Oscillibacter	0.158302	0.441113	0.804726	0.158302	0.804726		0.654654	-0.392792	0.130931	-0.654654	0.130931
	d__Bacteria.p__Firmicutes.c__Clostridia.o__Lachnospirales.f__Lachnospiraceae.g__.Ruminococcus._torques_group	0.898736	0.46791	0.383221	0.557699	0.383221		0.0676123	-0.371868	0.43948	-0.304256	0.43948
	d__Bacteria.p__Firmicutes.c__Clostridia.o__Oscillospirales.f__Oscillospirales.g__Oscillospirales	0.787172	0.622787	0.957155	0.468478	0.265703		0.142857	-0.257143	-0.0285714	-0.371429	0.542857
	d__Bacteria.p__Firmicutes.c__Clostridia.o__Christensenellales.f__Christensenellaceae.g__Christensenellaceae	0.804726	0.804726	0.158302	0.804726	0.158302		-0.130931	0.130931	0.654654	-0.130931	-0.654654
	d__Bacteria.p__Bacteroidota.c__Bacteroidia.o__Bacteroidales.f__Paludibacteraceae.g__Paludibacter	0.94931	0.46791	0.304559	0.557699	0.140357		-0.0338062	0.371868	0.507093	0.304256	-0.676123
