# Supplementary material for: Association of maternal genetics with the gut microbiome and eucalypt diet selection in captive koalas
Source: PeerJ. 2024 May 27;12:e17385. doi: 10.7717/peerj.17385 (PMC11138522; doi:10.7717/peerj.17385)
Supplement: Supplemental Information 12 [file peerj-12-17385-s012.xlsx]

## Sheet: Dataset S2
Supplemental Dataset S2 Frequency of consuming each eucalypt species in observed koalas.
	Boonda							Himawari							Kibou							Sora							Itsuki							Ito
month/day/time	T	M	CR	R	P	Unidentified		T	M	CR	R	P	Unidentified		T	M	CR	R	P	Unidentified		T	M	CR	R	P	Unidentified		T	M	CR	R	P	Unidentified		T	M	CR	R	P	Unidentified
11/21/9:00-10:00	0	0	93	12	-	1		0	0	0	0	-	0		0	0	0	1	-	0		16	0	0	0	-	2		0	0	0	20	-	2		2	0	0	0	-	0
11/21/11:00-12:00	0	0	0	0	-	0		0	0	0	0	-	0		0	0	0	0	-	0		0	0	0	0	-	0		0	0	0	0	-	0		0	0	0	0	-	0
11/21/14:00-15:00	0	0	0	0	0	0		29	0	0	0	0	0		0	0	0	0	0	0		0	0	0	0	0	0		0	0	0	0	0	0		2	0	16	0	0	0
11/21/16:00-17:00	36	1	15	2	0	0		0	0	0	6	61	0		0	1	0	0	16	0		0	0	0	0	0	0		0	0	0	1	37	0		0	0	0	24	33	0
11/22/9:00-10:00	0	0	4	-	38	9		1	0	40	-	0	0		0	0	6	-	32	0		0	0	21	-	0	0		0	0	21	-	0	0		0	0	0	-	0	0
11/22/11:00-12:00	0	0	0	-	0	0		0	0	0	-	0	0		0	0	0	-	10	0		0	0	0	-	0	0		0	0	0	-	0	0		0	0	0	-	0	0
11/22/14:00-15:00	0	0	0	0	0	0		0	0	0	0	0	0		0	0	0	0	0	0		0	0	0	0	0	0		0	0	0	0	0	0		0	0	0	0	0	0
11/22/16:00-17:00	5	0	61	8	2	2		0	0	5	0	2	0		0	0	0	0	0	0		0	0	0	0	0	0		0	0	0	40	10	3		0	0	1	0	27	5
11/24/9:00-10:00	53	2	-	0	0	0		37	0	-	2	1	0		0	0	-	3	5	1		2	16	-	0	21	0		16	33	-	0	3	1		29	0	-	0	0	0
11/24/11:00-12:00	0	0	-	0	0	0		0	0	-	0	0	0		0	0	-	0	0	0		0	0	-	0	0	0		0	0	-	0	0	0		0	0	-	0	0	0
11/24/14:00-15:00	0	0	0	0	0	0		6	0	0	0	0	0		0	0	0	14	8	0		0	0	0	0	0	0		0	0	0	0	0	0		0	0	0	0	0	0
11/24/16:00-17:00	12	0	2	3	55	1		0	0	0	1	76	0		0	0	0	0	0	0		0	0	0	8	19	0		0	4	0	0	19	0		0	0	8	9	38	0
11/25/9:00-10:00	0	-	0	15	3	1		0	-	0	0	0	0		0	-	0	0	0	0		0	-	0	0	29	0		27	-	0	0	0	0		6	-	0	0	0	0
11/25/11:00-12:00	0	-	0	0	0	0		0	-	0	0	0	0		0	-	0	0	0	0		0	-	0	0	0	0		0	-	0	0	0	0		0	-	0	0	0	0
11/25/14:00-15:00	0	0	0	0	0	0		0	0	0	0	0	0		0	0	0	0	0	0		0	0	0	0	0	0		0	0	0	0	0	0		0	0	0	0	0	0
11/25/16:00-17:00	25	0	5	2	0	1		7	0	1	0	1	0		0	0	0	2	35	0		0	0	0	10	14	1		0	0	0	0	0	0		0	0	3	0	0	0
11/26/9:00-10:00	-	9	0	0	33	0		-	0	0	0	0	0		-	0	0	0	21	0		-	0	0	0	0	0		-	5	0	4	10	0		-	0	0	0	0	0
11/26/11:00-12:00	-	0	0	0	0	0		-	0	0	0	0	0		-	0	0	0	0	0		-	0	0	0	0	0		-	0	0	0	0	0		-	0	0	0	0	0
11/26/14:00-15:00	0	0	0	0	0	0		0	0	0	0	0	0		0	0	0	0	0	0		0	0	0	0	0	0		0	0	0	0	0	0		0	0	0	0	0	0
11/26/16:00-17:00	0	0	32	0	54	1		5	0	0	0	37	0		0	0	0	27	6	0		0	0	0	0	0	0		0	0	4	0	22	0		0	0	1	2	34	1
11/27/9:00-10:00	17	16	0	0	-	2		17	0	5	0	-	1		2	0	0	0	-	0		21	0	0	0	-	0		24	0	0	0	-	0		0	0	0	0	-	0
11/27/11:00-12:00	0	0	0	0	-	0		0	0	0	0	-	0		0	0	0	0	-	0		0	0	0	0	-	0		0	0	0	0	-	0		0	0	0	0	-	0
11/27/14:00-15:00	0	0	0	0	0	0		0	0	6	1	0	0		0	0	0	0	0	0		0	0	0	0	0	0		24	0	0	0	0	0		0	0	0	0	0	0
11/27/16:00-17:00	1	0	12	16	23	0		0	0	0	0	45	0		2	0	0	0	0	0		0	10	0	0	0	0		12	0	0	0	76	1		0	1	16	15	17	0
11/29/9:00-10:00	0	0	-	3	70	0		16	0	-	0	0	0		0	0	-	2	6	0		8	3	-	0	14	0		0	0	-	0	23	0		1	0	-	0	0	0
11/29/11:00-12:00	0	0	-	0	0	0		0	0	-	0	0	0		0	0	-	0	0	0		0	0	-	0	0	0		0	0	-	0	0	0		0	0	-	0	0	0
11/29/14:00-15:00	0	0	0	0	0	0		20	0	0	0	2	0		0	0	0	2	15	3		0	6	0	0	0	2		0	0	0	0	0	0		0	0	0	0	0	0
11/29/16:00-17:00	1	0	39	14	0	0		30	0	0	0	0	0		0	0	5	0	41	0		42	0	0	0	0	0		5	0	0	43	0	0		0	0	0	1	42	1
11/30/9:00-10:00	0	0	16	-	17	0		30	2	0	-	0	0		0	0	3	-	9	0		14	0	1	-	16	1		0	0	17	-	4	0		0	0	0	-	61	0
11/30/11:00-12:00	0	0	0	-	0	0		0	0	0	-	0	0		0	0	0	-	0	0		0	0	0	-	0	0		0	0	0	-	0	0		0	0	0	-	0	0
11/30/14:00-15:00	0	0	0	0	0	0		0	0	0	0	0	0		0	0	0	0	0	0		0	0	0	0	0	0		0	0	2	0	0	0		0	0	0	0	0	0
11/30/16:00-17:00	0	0	21	11	0	0		4	0	0	0	0	0		0	0	1	0	0	0		0	0	0	0	0	0		0	0	0	0	0	0		13	5	18	6	7	2
total	150	28	300	86	295	18		202	2	57	10	225	1		4	1	15	51	204	4		103	35	22	18	113	6		108	42	44	108	204	7		53	6	63	57	259	9
